# Supplementary material for: Genome organization by SATB1 binding to base-unpairing regions (BURs) provides a scaffold for SATB1-regulated gene expression
Source: eLife. 2025 Oct 2;14:RP105915. doi: 10.7554/eLife.105915 (PMC12490858; doi:10.7554/eLife.105915)
Supplement: Supplementary file 1. [file elife-105915-supp1.xlsx]

## Sheet: Sheet1
		Supplementary File 1. Intersection analysis of ChIP-seq samples
				UREA	UREA	Standard	Standard	UREA	UREA	UREA	UREA	UREA	UREA	Standard
				SATB1	SATB1	SATB1	SATB1	SATB1	SATB1	SATB	SATB1	CTCF	CTCF	CTCF
			BUR-L	thymus	thymus	thymus	thymus	brain	brain	skin	skin	thymus	skin	thymus
		%	A	B	C	D	E	F	G	H	I	J	K	L
		A-120A		12.676	14.338	0.773974	0.595688	36.4137	33.5422	3.69326	3.61691	0.252118	0.575971	0.598205
		B- 355B	77.7146		85.0188	1.12134	0.861581	92.0683	90.2834	24.1294	23.5559	0.766421	1.00046	0.861581
		C-355C	75.8707	73.3801		0.958956	0.754734	92.3883	91.7401	20.8151	20.1736	0.6837	0.934538	0.765833
		D-328B	3.82979	0.905034	0.896731		47.919	1.27867	1.10846	1.93046	1.90763	22.3456	23.3129	36.3902
		E-408B	5.23078	1.23402	1.25244	85.037		1.72026	1.56555	3.95992	3.58787	18.0793	21.9877	37.7095
		F-345A	73.5849	30.3468	35.2822	0.522198	0.395887		78.116	7.79821	7.59475	0.306876	0.582386	0.560345
		G-345B	73.2525	32.1601	37.8621	0.489217	0.389358	84.4202		8.33226	8.09315	0.299577	0.562508	0.557011
		H-404B	78.54	83.6931	83.6485	8.29616	9.58965	82.0607	81.1329		81.0616	2.34612	12.8457	1.7752
		I-404E	79.4947	84.4459	83.7913	8.47317	8.98027	82.6019	81.4494	83.782		2.37876	12.1704	1.69648
		J-346D	2.95724	1.46632	1.51552	52.9695	24.15	1.78123	1.60901	1.2941	1.2695		83.5261	60.2175
		K-403C	4.35749	1.23457	1.33613	35.6438	18.9438	2.18033	1.94865	4.57012	4.18928	53.8735		42.8608
		L-Encode LICR	2.68429	0.6306	0.649424	33.0002	19.27	1.24426	1.14449	0.374595	0.346359	23.0367	25.4217
		Supplementary file 1. Intersection of peaks were determined by deepTools between two samples of choice. Percent of peaks in each sample on the left column intersected with peaks in each of the samples on the top row are indicated.
