# Supplementary material for: Genome organization by SATB1 binding to base-unpairing regions (BURs) provides a scaffold for SATB1-regulated gene expression
Source: eLife. 2025 Oct 2;14:RP105915. doi: 10.7554/eLife.105915 (PMC12490858; doi:10.7554/eLife.105915)
Supplement: Supplementary file 2. [file elife-105915-supp2.xlsx]

## Sheet: Sheet1
		Supplementary file 2. ChIP-seq sample identification and peak number
				Sample ID	Total #Peaks
		A. BUR-L		A-120A	238380
		B. UREA SATB1 thymus	replica 1	B-355B	38882
		C. UREA SATB1 thymus	replica 2	C-355C	45049
		D. Std SATB1 thymus	replica 1	D-328B	48175
		E. Std SATB1 thymus	replica 2	E-408B	27147
		F. UREA SATB1 brain	replica 1	F-345A	117963
		G. UREA SATB1 brain	replica 2	G-345B	109154
		H. UREA SATB1 skin	replica 1	H-404B	11210
		I. UREA SATB1 skin	replica 2	I-404E	10846
		J. UREA CTCF thymus	replica 1	J-346D	20323
		K. UREA CTCF skin	replica 1	K-403C	31509
		L. Std CTCF thymus	Encode	L-Encode LICR	53124
		Supplementary Table 2. Identification of each sample and their total number of peaks are shown.
