# Supplementary material for: Genome organization by SATB1 binding to base-unpairing regions (BURs) provides a scaffold for SATB1-regulated gene expression
Source: eLife. 2025 Oct 2;14:RP105915. doi: 10.7554/eLife.105915 (PMC12490858; doi:10.7554/eLife.105915)
Supplement: Supplementary file 3. [file elife-105915-supp3.xlsx]

## Sheet: Sheet1
		Supplementary file 3. Intersection analysis of WT and KO ChIP-seq samples
			TKS355B	TKS400B	TKS400D	TKS340	TKS356A	TKS408B	TKS407D	TKS407B	TKS390A	TKS407C
			SATB1 ChIP	Phantom (KO SATB1 ChIP)	Phantom (KO SATB1 ChIP	Urea Input	Urea Input	SATB1 ChIP	Phantom (KO SATB1 ChIP)	Phantom (KO SATB1 ChIP)	Standard Input	Standard Input
			UREA	UREA antibody 1	UREA antibody 2	WT	KO	STANDARD	Standard Antibody 1	Standard Antibody 2	WT	KO
		TKS355B		0	0	0.4	0.4	0.8	0.1	0.1	0.5	0.3
		TKS400B	1		78.5	33.6	6.1	85.7	89.7	93.8	53	15.3
		TKS400D	0.8	66.1		25.4	4.2	88.9	93.2	93.2	41.5	11.8
		TKS340A	10.7	1.4	1.3		51.2	55.6	7.8	10.6	79.2	39.3
		TKS356A	17.7	0.4	0.3	90.8		76.1	8.3	12.3	93.4	59.4
		TKS408B	1.2	0.3	0.3	4.1	3.1		3.6	4.5	12.7	3
		TKS407D	2.3	3.1	3.8	6.7	4.3	36.4		90.9	9.6	4.1
		TKS407B	1.3	1.3	1.5	3.5	2.3	18.2	37.2		4.9	2.2
		TKS390A	3.6	0.7	0.6	25.2	16.9	52	3.6	4.6		14.3
		TKS407C	16.7	1.2	1.1	75.7	63.9	79.8	8.3	12	86.5
		Supplementary file 3. Intersection of peaks were determined by deepTools between two samples of choice. Percent of peaks in each sample on the left column that intersected with peaks in each sample on the top row are indicated. Important sets of data for comparison are highlighted in blue for urea ChIP-seq and pink for standard ChIP-seq.
