# Supplementary material for: Genome organization by SATB1 binding to base-unpairing regions (BURs) provides a scaffold for SATB1-regulated gene expression
Source: eLife. 2025 Oct 2;14:RP105915. doi: 10.7554/eLife.105915 (PMC12490858; doi:10.7554/eLife.105915)
Supplement: Supplementary file 4. [file elife-105915-supp4.xlsx]

## Sheet: Sheet1
	Supplementary file 4. WT and KO ChIP-seq sample identification and total peak number
	Sample ID	Description	Total # Peaks
	TKS355B	SATB1 ureaChIP-seq	38882
	TKS400B	KO SATB1 ureaChIP-seq 1	98
	TKS400D	KO SATB1 ureaChIP-seq 2	118
	TKS340A	Input ureaChIP-seq 1	2381
	TKS356A	Input ureaChIP-seq 1	1372
	TKS408B	SATB1 standard ChIP-seq	27147
	TKS407D	KO SATB1 standard ChIP-seq 1	2884
	TKS407B	KO SATB1 standard ChIP-seq 2	7003
	TKS390A	Input Standard ChIP-seq 1	7377
	TKS407C	Input Standard ChIP-seq 2	1224
	Supplementary file 4. Identification of each sample and their total number of peaks are shown.
